# Supplementary material
Source: publisher site journal article supplement (https://www.spandidos-publications.com/3456/downloadSupplementary)

Figure S1. Proof of transfection. Jurkat cells were transfected with control-siRNA or PTEN-siRNA for 48 h, then PTEN mRNA expression was determined using reverse transcription-quantitative PCR. \*\* $P < 0.01$  vs. control-siRNA. siRNA, small interfering RNA; PTEN, phosphatase and tensin homologue deleted on chromosome 10.

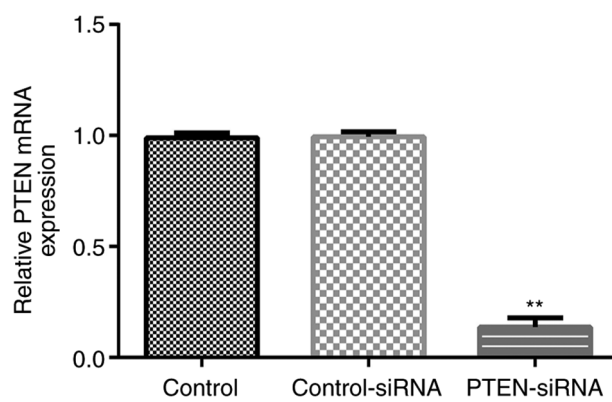

Supplement: Supplementary file 1 [file downloadSupplementary]
